# Supplementary material for: Inhibition of MEK1 Signaling Pathway in the Liver Ameliorates Insulin Resistance
Source: PubMed Central journal article supplement (PMC4709921; doi:10.1155/2016/8264830), 2015-12-28
Supplement: 8264830.f1.pdf [file 8264830.f1.pdf]

1 **Supplemental data**

2 **Inhibition of MEK1 signaling pathway in the liver ameliorates insulin**  
3 **resistance**

4 **Short running title:** MEK1 inhibition ameliorates insulin resistance

5 Atsunori Ueyama<sup>1,4,\*</sup>, Nobuhiro Ban<sup>1</sup>, Masanori Fukazawa<sup>1</sup>, Tohru Hirayama<sup>1</sup>, Minako Takeda<sup>1</sup>,  
6 Tatsuo Yata<sup>2</sup>, Hiroyasu Muramatsu<sup>1</sup>, Masaki Hoshino<sup>1</sup>, Marii Yamamoto<sup>1</sup>, Masao Matsuo<sup>1</sup>, Yuka  
7 Kawashima<sup>1</sup>, Tatsuhiko Iwase<sup>3</sup>, Takehisa Kitazawa<sup>1</sup>, Youichi Kushima<sup>1</sup>, Yuichiro Yamada<sup>4</sup>, and  
8 Yoshiki Kawabe<sup>1</sup>

9 <sup>1</sup> *Research Division, Chugai Pharmaceutical Co., Ltd.,* <sup>2</sup>*Chugai Research Institute for Medical Science,*  
10 *1-135 Komakado, Gotemba-city, Shizuoka 412-8513, Japan,*

11 <sup>3</sup> *Project Planning & Coordination Department, Chugai Pharmaceutical Co., Ltd, 2-1-1 Nihonbashi,*  
12 *Muromachi, Chuo-ku, Tokyo 103-8324, Japan,*

13 <sup>4</sup> *Department of Endocrinology, Diabetes and Geriatric Medicine, Akita University School of Medicine,*  
14 *1-1-1 Hondo, Akita-city, Akita 010-8543, Japan*

15 **\*Corresponding author**

16 Atsunori Ueyama

17 Discovery of Pharmacological Research Department 1,

18 Chugai Pharmaceutical Co., Ltd.,

19 1-135 Komakado, Gotemba-city, Shizuoka 412-8513, Japan

20 TEL: +81-550-87-6738, FAX: +81-550-87-5219, E-mail: ueyamaatn@chugai-pharm.co.jp

21 **3 supplemental tables, 6 supplemental figures, 1 supplemental reference**

22

1 **Supplemental Table S1**

2 IC<sub>50</sub> values and serum half-life of RO5126766 and RO4987655

|                                                                               |       | RO5126766 | RO4987655 |
|-------------------------------------------------------------------------------|-------|-----------|-----------|
| Kinase inhibition, <i>in vitro</i> , IC <sub>50</sub> (μmol·L <sup>-1</sup> ) | Raf1  | 0.056     | >50       |
|                                                                               | MEK1  | 0.16      | 0.0052    |
| Serum half-life (h)                                                           | Mouse | 4.5       | 3.5       |
|                                                                               | Human | 53–95     | 25        |

3

4

1 **Supplemental Table S2**

2 Effect of RO5126766 on blood chemical values in *db/db* mice after 17 days of treatment. RO5126766  
 3 was administrated as a dietary admixture in the indicated dosages (mg in 1 kg CE-2). Plasma was  
 4 obtained after exsanguination under anesthesia at the end of the administration period. Data are  
 5 expressed as mean  $\pm$  SEM.

|                             |          | AST                  | ALT                  | ALP                  | TC                     | TG                     | UN                     | CRE                    | GLUC                   |
|-----------------------------|----------|----------------------|----------------------|----------------------|------------------------|------------------------|------------------------|------------------------|------------------------|
| RO5126766 (mg in 1 kg CE-2) | <i>n</i> | (U·L <sup>-1</sup> ) | (U·L <sup>-1</sup> ) | (U·L <sup>-1</sup> ) | (mg·dL <sup>-1</sup> ) | (mg·dL <sup>-1</sup> ) | (mg·dL <sup>-1</sup> ) | (mg·dL <sup>-1</sup> ) | (mg·dL <sup>-1</sup> ) |
| 0                           | 6        | 40 $\pm$ 3           | 47 $\pm$ 3           | 338 $\pm$ 11         | 129 $\pm$ 4            | 106 $\pm$ 10           | 26.8 $\pm$ 1.5         | 0.06 $\pm$ 0.01        | 682 $\pm$ 68           |
| 0.86                        | 5        | 39 $\pm$ 1           | 52 $\pm$ 3           | 248 $\pm$ 17         | 132 $\pm$ 8            | 110 $\pm$ 11           | 29.6 $\pm$ 1.0         | 0.05 $\pm$ 0.01        | 669 $\pm$ 64           |
| 1.72                        | 5        | 51 $\pm$ 3           | 62 $\pm$ 6           | 259 $\pm$ 7          | 140 $\pm$ 4            | 99 $\pm$ 14            | 28.0 $\pm$ 0.6         | 0.05 $\pm$ 0.00        | 557 $\pm$ 26           |
| 3.44                        | 5        | 61 $\pm$ 6           | 56 $\pm$ 6           | 170 $\pm$ 17         | 127 $\pm$ 3            | 105 $\pm$ 4            | 33.9 $\pm$ 2.3         | 0.07 $\pm$ 0.01        | 468 $\pm$ 66           |

6  
7  
8  
9  
10  
11  
12  
13  
14  
15

AST: aspartate aminotransferase

ALT: alanine aminotransferase

ALP: alkaline phosphatase

TC: total cholesterol

TG: triglycerides

UN: urea nitrogen

CRE: creatinine

GLUC: glucose

1 **Supplemental Table S3**

2 Effect of RO4987655 on blood chemical values in *db/db* mice after 17 days of treatment. RO4987655  
 3 was administrated as a dietary admixture in the indicated dosages (mg in 1 kg CE-2). Plasma was  
 4 obtained after exsanguination under anesthesia at the end of the administration period. Data are  
 5 expressed as mean  $\pm$  SEM.

|                             |          | AST                  | ALT                  | ALP                  | TC                     | TG                     | UN                     | CRE                    | GLUC                   |
|-----------------------------|----------|----------------------|----------------------|----------------------|------------------------|------------------------|------------------------|------------------------|------------------------|
| RO4987655 (mg in 1 kg CE-2) | <i>n</i> | (U·L <sup>-1</sup> ) | (U·L <sup>-1</sup> ) | (U·L <sup>-1</sup> ) | (mg·dL <sup>-1</sup> ) | (mg·dL <sup>-1</sup> ) | (mg·dL <sup>-1</sup> ) | (mg·dL <sup>-1</sup> ) | (mg·dL <sup>-1</sup> ) |
| 0                           | 6        | 54 $\pm$ 4           | 68 $\pm$ 6           | 317 $\pm$ 24         | 126 $\pm$ 6            | 119 $\pm$ 14           | 24.8 $\pm$ 1.3         | 0.07 $\pm$ 0.01        | 661 $\pm$ 20           |
| 2                           | 5        | 68 $\pm$ 8           | 93 $\pm$ 9           | 272 $\pm$ 11         | 127 $\pm$ 6            | 124 $\pm$ 17           | 30.4 $\pm$ 2.0         | 0.08 $\pm$ 0.01        | 680 $\pm$ 28           |
| 4                           | 6        | 73 $\pm$ 9           | 92 $\pm$ 12          | 228 $\pm$ 23         | 132 $\pm$ 5            | 94 $\pm$ 16            | 29.9 $\pm$ 1.4         | 0.08 $\pm$ 0.01        | 517 $\pm$ 38           |
| 8                           | 6        | 70 $\pm$ 9           | 98 $\pm$ 22          | 189 $\pm$ 28         | 124 $\pm$ 7            | 73 $\pm$ 8             | 33.5 $\pm$ 3.2         | 0.08 $\pm$ 0.01        | 483 $\pm$ 49           |

6  
7  
8  
9  
10  
11  
12  
13  
14  
15

AST: aspartate aminotransferase

ALT: alanine aminotransferase

ALP: alkaline phosphatase

TC: total cholesterol

TG: triglycerides

UN: urea nitrogen

CRE: creatinine

GLUC: glucose

1 **Supplemental Figure S1**

2 Inhibition of pERK1/2 in peripheral blood mononuclear cells (PBMC) from *db/db* mice treated for  
3 17 days with (a) RO5126766 or (b) RO4987655 as a dietary admixture at the indicated dosage (mg in  
4 1 kg CE-2). Phosphorylation of ERK1/2 was detected by flow cytometry. Data are expressed as mean  $\pm$   
5 SEM,  $n = 5-6$  performed in duplicate. The number (%) indicated above each column shows percentage  
6 inhibition when phorbol 12-myristate 13-acetate (PMA)(-) in PBMC from control mice was set as 0%  
7 and PMA(+) was set as 100%. **Method:** At the end of the 17-day RO5126766 or RO4987655  
8 administration period, blood was collected and incubated with or without  $40 \mu\text{mol}\cdot\text{L}^{-1}$  of PMA (Sigma-  
9 Aldrich Corporation, St. Louis, MO, USA) for 10 min at  $37^\circ\text{C}$  to activate the MAPK pathway in the  
10 blood cells. Following PMA stimulation, blood cells were fixed and red blood cells were lysed by the  
11 addition of  $1\times$  Lyse/Fix buffer (BD Biosciences, Franklin Lakes, NJ, USA), which allows samples to  
12 maintain their *in vivo* MEK/ERK status. After lysis and fixation, supernatant was removed and then  
13 Perm Buffer II (BD Biosciences) was added to the resulting cells. After washing, the resulting cells were  
14 stained with two antibodies (Alexa Fluor 488-conjugated phospho-p44/42 MAPK antibody [ERK1/2;  
15 Thr<sup>202</sup>/Tyr<sup>204</sup>]; Cell Signaling Technology, Beverly, MA, USA) and PE-conjugated hamster anti-mouse  
16 CD3e antibody (BD Biosciences). The CD3e antibody was used to identify T-lymphocytes, thus  
17 allowing pERK1/2 levels to be analyzed only in the gated CD3-positive lymphocyte population.  
18 Phosphorylation of ERK1/2 in PBMCs was assessed by using flow cytometry. The mean fluorescence  
19 intensity was measured.

20

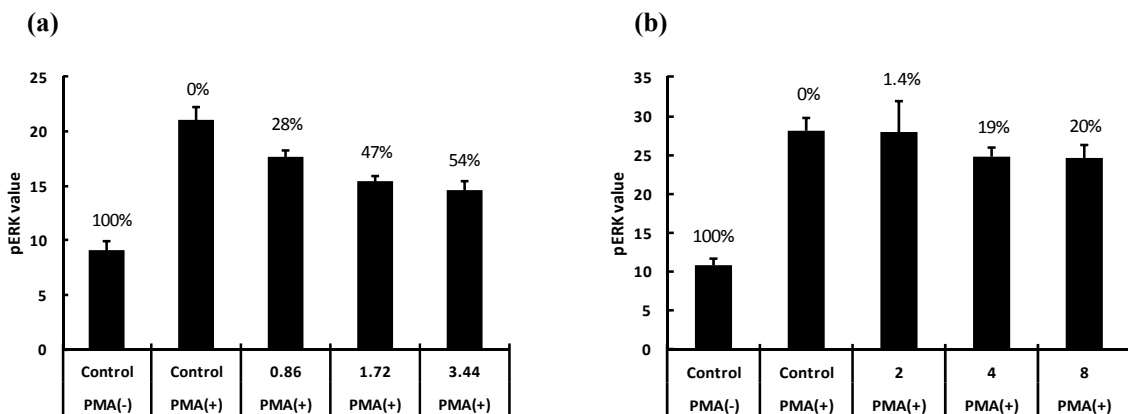

21

1 **Supplemental Figure S2**

2 Effects of RO5126766 (a, c, e, g, i, k) and RO4987655 (b, d, f, h, j, k) on (a, b) blood glucose (BG),  
3 (c, d) glucose excursion, (e, f) AUC during the oral glucose tolerance test (OGTT), (g, h) food intake  
4 (FI), (i, j) body weight (BW), and (k) HbA1c in 8-week-old male KK-Ay/Ta Jcl mice (CLEA Japan,  
5 Tokyo, Japan). RO5126766 or RO4987655 was administrated for 14 days as a dietary admixture in the  
6 dosages indicated (mg in 1 kg CE-2). OGTT (2 g·kg<sup>-1</sup> of 20% glucose solution) was performed after 14  
7 days of treatment. Hemoglobin A1c (%) was calculated as HbA1c (g·dL<sup>-1</sup>) divided by total Hb (g·dL<sup>-1</sup>).  
8 IFCC HbA1c values (mmol·mol<sup>-1</sup>) were converted at <http://www.ngsp.org/convert1.asp>. Data are  
9 expressed as mean ± SEM, n = 6. \*p < 0.05, \*\*p < 0.01, \*\*\*p < 0.001 vs. Control by Dunnett's multiple-  
10 comparison test.

11

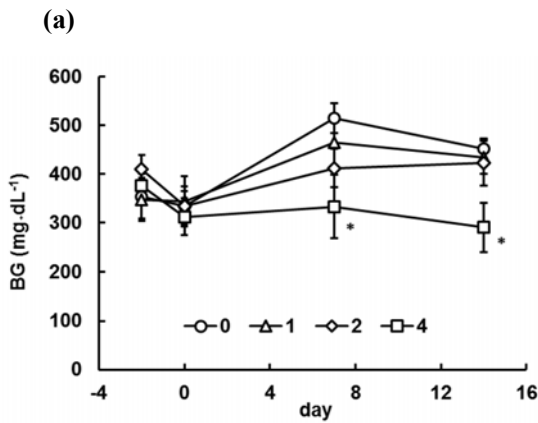

(b)

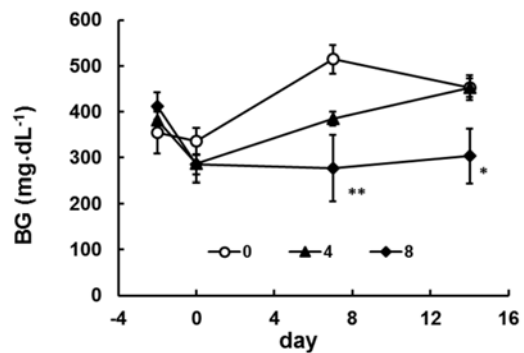

12

13

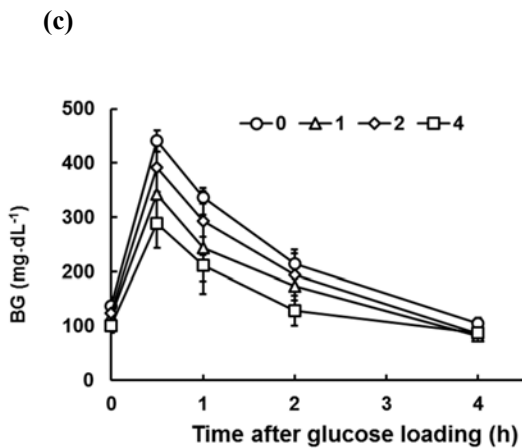

(d)

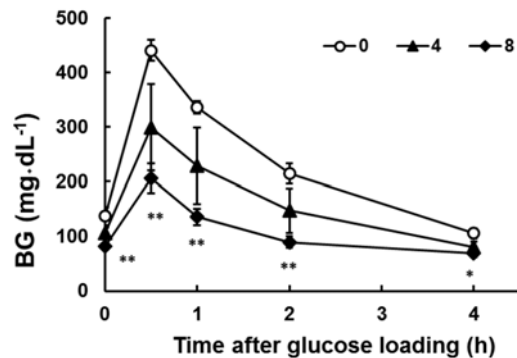

15

1

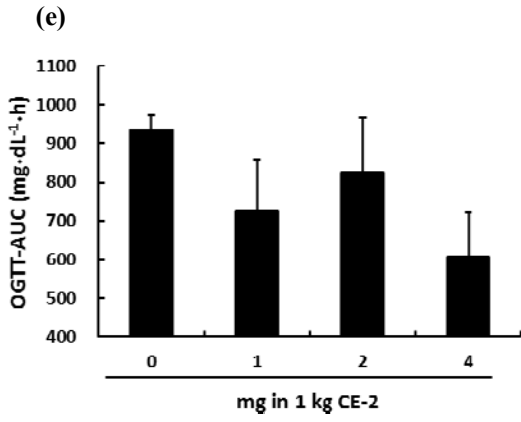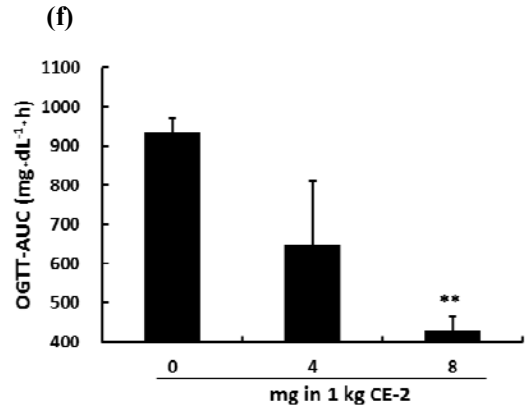

2

3

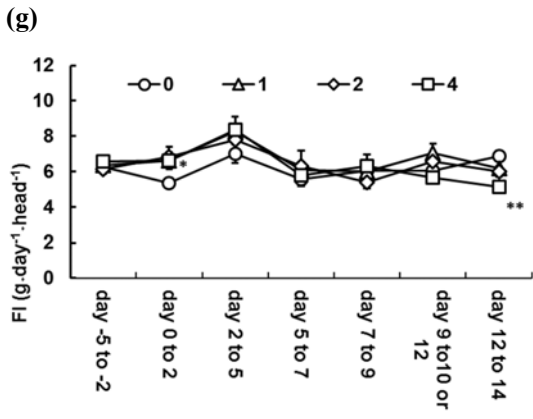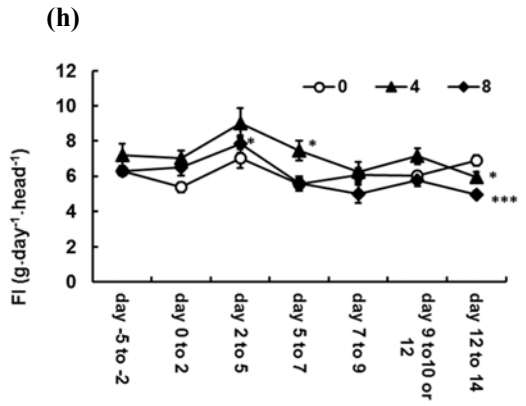

4

5

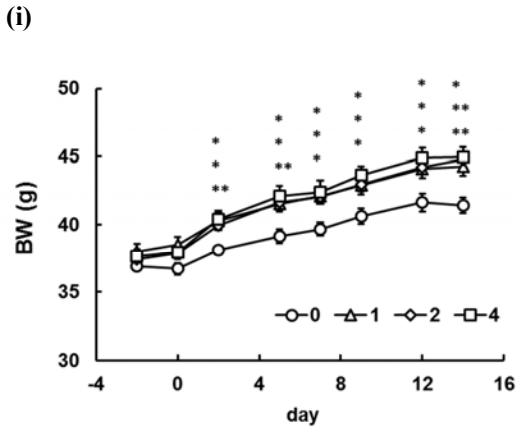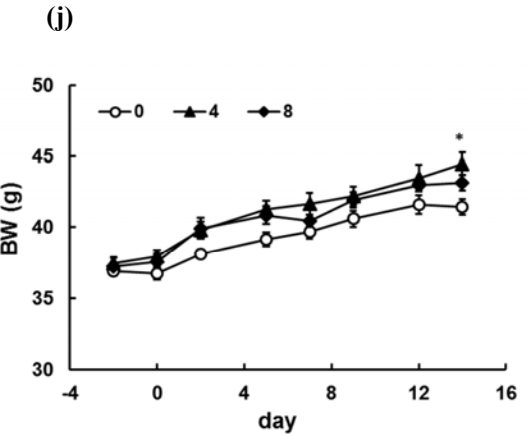

6

7

1 (k)  
2

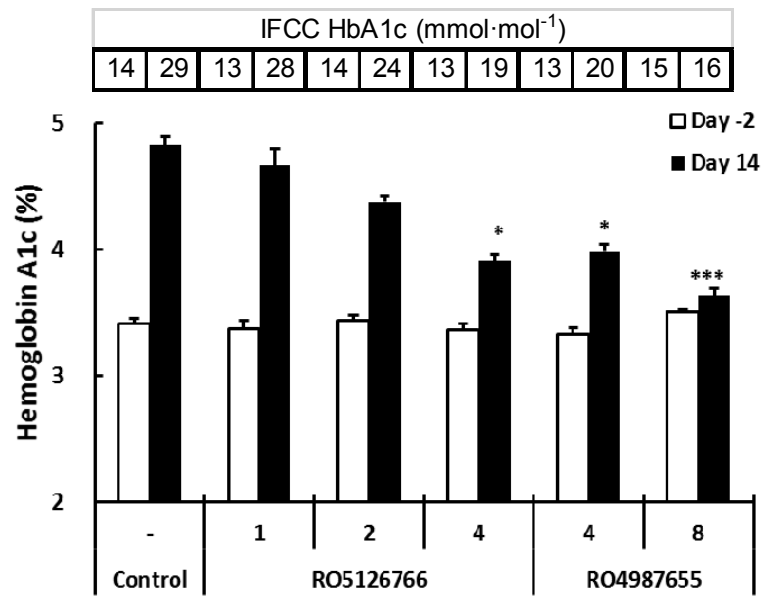

3  
4  
5  
6  
7  
8  
9  
10  
11  
12  
13



1 **Supplemental Figure S3**

2 Effects of pioglitazone (200 mg in 1 kg CE-2) on **(a, b)** body weight (BW) and **(c)** blood glucose (BG)  
3 in **(a)** *db/db* or **(b, c)** KK-Ay mice. Data are expressed as mean  $\pm$  SEM,  $n = 6$ .  $\$p < 0.01$  vs. Control  
4 (0 mg in 1 kg CE-2) by Dunnett's multiple-comparison test,  $**p < 0.01$ ,  $***p < 0.001$  vs. Control by  
5 Welch's test. Mean dosage of pioglitazone (200 mg in 1 kg CE-2) was about  $30 \text{ mg} \cdot \text{kg}^{-1} \cdot \text{day}^{-1}$ .

6 **(a)**

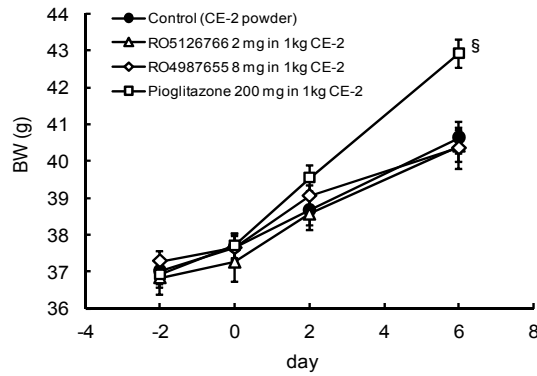

7 **(b)**

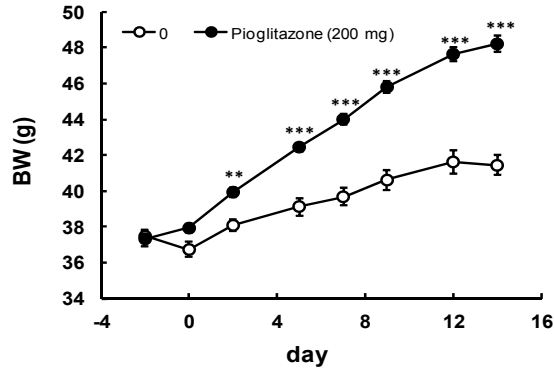

8 **(c)**

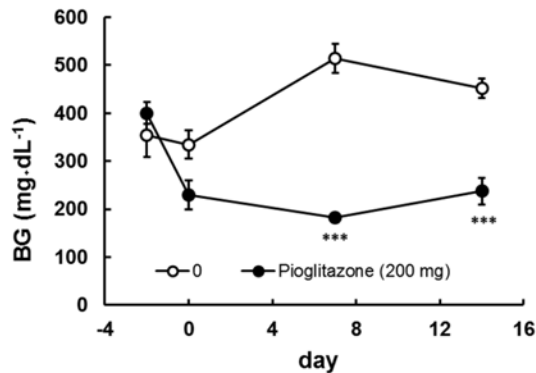

1 **Supplemental Figure S4**

2 Effect of food restriction (70%) on (a) food intake (FI), (b) body weight, (c) blood glucose, (d) oral  
 3 glucose tolerance test (OGTT) ( $2 \text{ g} \cdot \text{kg}^{-1}$  of 20% glucose solution), and (e) AUC of OGTT in *db/db* mice.  
 4 Seven-week-old *db/db* mice were fed *ad lib* (master, 100%; slave, 70%) using a synchronized pellet  
 5 pair-feeding apparatus (PairMex, Osaka Micro Systems, Settsu, Japan [1]) for 13 days. Data are  
 6 expressed as (a) mean  $\pm$  SD or (b–e) mean  $\pm$  SEM,  $n = 4$ .

7

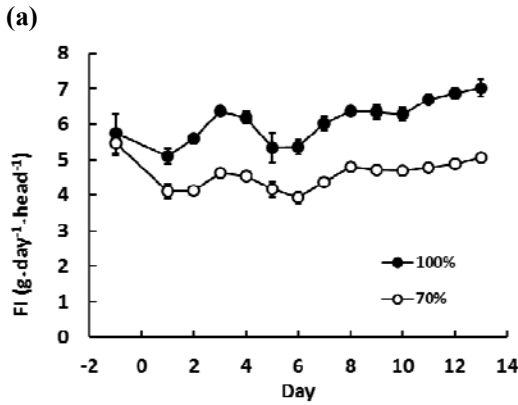

8

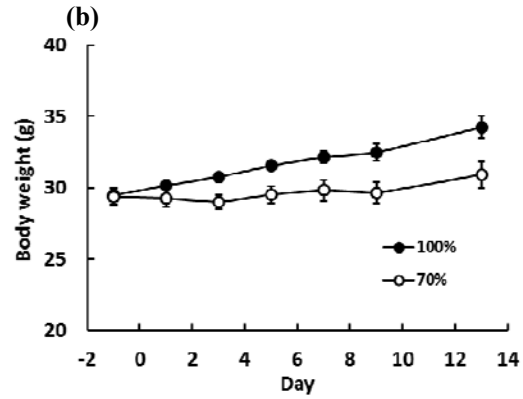

9

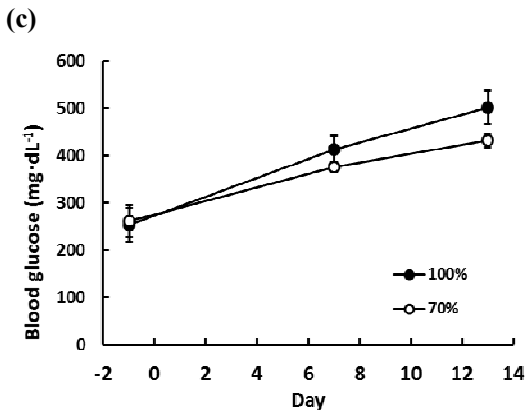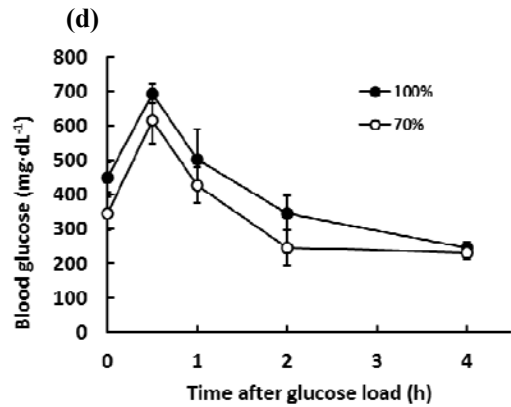

10

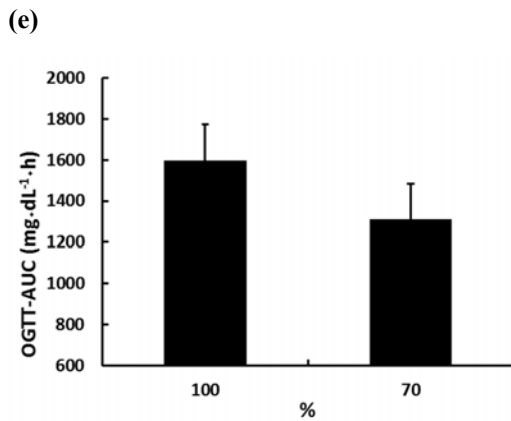

10

1 **Supplemental Figure S5**

2 The effect of RO5126766 and RO4987655 on plasma insulin level during the oral glucose tolerance test  
3 in *db/db* mice. After administration of these compounds as a dietary admixture for 14 days, mice were  
4 fasted overnight. Next morning, blood glucose was measured, followed by oral administration of glucose  
5 ( $2 \text{ g}\cdot\text{kg}^{-1}$  of 20% glucose solution). Plasma insulin level was measured by insulin ELISA kit (Morinaga  
6 Institute of Biological Science, Inc., Yokohama, Japan). Data are expressed as mean  $\pm$  SEM,  $n = 8$ .

7

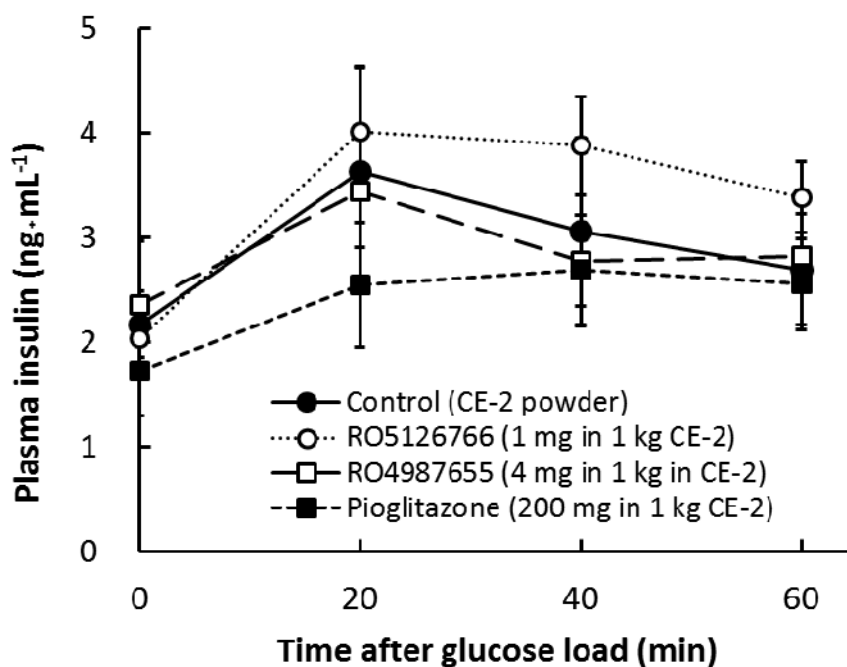

8

9

10

11

12

13

1 **Supplemental Figure S6**

2 Effect of RO5126766 (1 mg in 1 kg CE-2), RO4987655 (4 mg in 1 kg CE-2), and pioglitazone (200 mg  
3 in 1 kg CE-2) on adipogenic gene expressions in epididymal adipose tissue from *db/db* mice.  
4 Epididymal adipose tissue was harvested after treatment for 17 days. Total RNA was extracted using by  
5 an RNeasy kit (Qiagen, Limburg, Netherlands) according to the instruction manual. mRNA expression  
6 level was determined by quantitative real-time polymerase chain reaction (qRT-PCR) using *Gapdh* as an  
7 internal control. Data are expressed as mean  $\pm$  SEM,  $n = 8$ .  $**p < 0.01$ ,  $***p < 0.001$  vs. Control by  
8 Dunnett's multiple-comparison test. *Acox1*, acyl-Coenzyme A oxidase 1; *Acs11*, acyl-CoA synthetase  
9 long-chain family member 1; *Fabp4*, fatty acid binding protein 4. All primers were purchased from  
10 Applied Biosystems (Carlsbad, CA, USA), Assay ID: *Acox1*, Mm00443579\_m1; *Acs11*,  
11 Mm00484217\_m1; *Fabp4*, Mm00445880\_m1; Part No. of *Gapdh*, 4352339E.

12

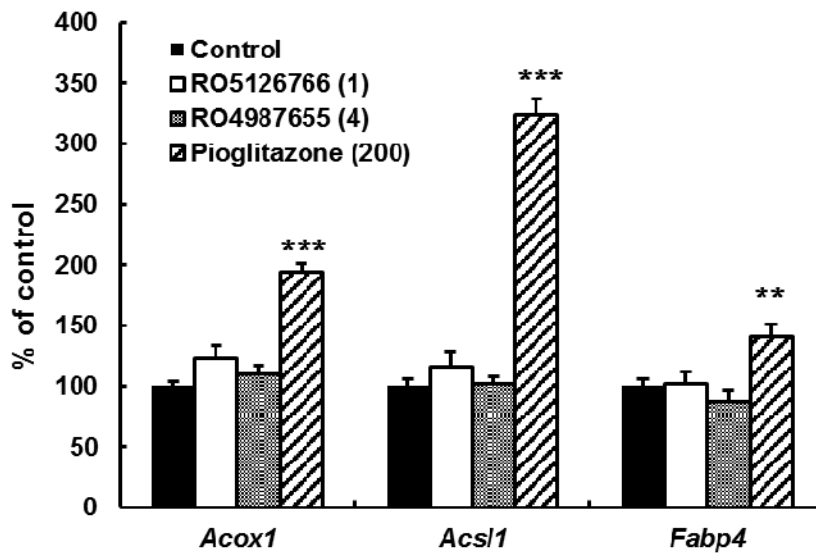

13

14

15

16

17

18

1 **Supplemental reference**

- 2 [1] Nakagawa, T., Tsuchida, A., Itakura, Y., Nonomura, T., Ono, M., Hirota, F., Inoue, T.,  
3 Nakayama, C., Taiji, M., and Noguchi, H, “Brain-derived neurotrophic factor regulates  
4 glucose metabolism by modulating energy balance in diabetic mice”, *Diabetes*, vol. 49, no. 3,  
5 pp. 436–444, 2000.

6

7
